# Supplementary material
Source: Springer Nature journal article supplement (https://www.springermedizin.de/resource/supplementary/12894_2013_289_MOESM4_ESM.pdf/9513384)

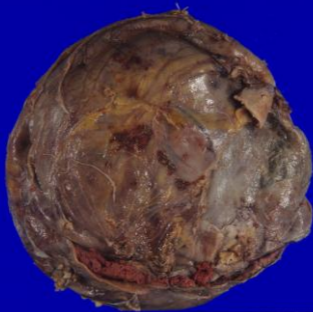

10

15

20

25

30

35

Supplement: MOESM4 [file 9513384]
